# Supplementary material
Source: Elsevier journal article supplement (https://www.sciencedirect.com/science/article/pii/S0214158220301146)
Supplement: mmc1 [file S0214158220301146:mmc1.pdf]

**SENOL-D-20-00042**

## **PLATAFORMAS GENÉTICAS: ¿HACEMOS LO QUE SABEMOS? O ¿SABEMOS LO QUE HACEMOS?**

**Título abreviado:** Plataformas genéticas. Encuesta a unidades de mama acreditadas

Laia Bernet<sup>1\*</sup>, María Jesús Pla<sup>2</sup> y Noelia Martínez Jañez<sup>3</sup>

<sup>1</sup>Unidad Patología Mamaria. Grupo Ribera Salud

<sup>2</sup>Unitat Funcional de Mama. Hospital Universitari de Bellvitge-Institut Català D'oncologia.  
Barcelona

<sup>3</sup>Oncología Medica. Hospital Ramon y Cajal. Madrid

\*Correo electrónico: [Bernet\\_lai@gva.es](mailto:Bernet_lai@gva.es)

## Resumen

La patología molecular y genómica constituye un pilar irrenunciable del diagnóstico en patología mamaria, de tal manera que la información genética ha sido ya integrada en la toma de decisiones terapéuticas. Actualmente, existen diferentes plataformas comerciales disponibles en la clínica, generalmente con pocas o nulas coincidencias en los genes incluidos, en su fundamento técnico, en la definición de grupos de riesgo, en la información que proporcionan, en sus indicaciones y en el circuito requerido para la realización de las mismas.

Objetivo: Evaluar el uso y conocimiento de dichas plataformas. Material y métodos: Se realizó una encuesta de once preguntas dirigidas a las Unidades de Mama Acreditadas en España por la SESPM en ese momento. Resultados: Respondieron 26 Unidades de 36 encuestadas y se obtuvieron datos que pueden ser orientativos acerca del uso de las plataformas y pueden servir como punto de partida para profundizar en su conocimiento. Conclusiones: Es necesario re-evaluar indicaciones aprobadas por las CCAA. No existe evidencia suficiente para tomar decisiones sobre la axila en función de la plataforma. MammaPrint® es la única plataforma con evidencia IA para pacientes N1-3. Además, Identifica un subgrupo de pacientes que pueden no requerir tratamiento hormonal.

**Palabras clave:** Cáncer de mama, plataforma genética, evidencia, ultra-low risk

## **INTRODUCCIÓN:**

El cáncer de mama es una enfermedad heterogénea no sólo desde el punto de vista morfológico sino también genético, con intervalos libres de enfermedad y de recidiva muy variables, que oscilan desde meses hasta décadas desde el diagnóstico y el tratamiento inicial.

La toma de decisiones terapéuticas se basa, fundamentalmente, en las características del tumor, tanto morfológicas como biológicas, y en su extensión. Recientemente, también se ha integrado la información genética para identificar pacientes con Alto Riesgo (AR) clínico y patológico, pero Bajo Riesgo (BR) genómico, que no requieren quimioterapia.

Dado que la patología molecular y genómica constituye ya un pilar irrenunciable del diagnóstico en patología mamaria, múltiples plataformas comerciales están disponibles en la clínica, generalmente con pocas o nulas coincidencias en los genes incluidos, en su fundamento técnico, en la definición de grupos de riesgo, en la información que proporcionan, en sus indicaciones y en el circuito requerido para la realización de estas.

## **OBJETIVOS:**

Explorar el grado de conocimiento que tenemos de las plataformas genómicas para cáncer de mama en la práctica diaria, desde la SESPM y a través de una breve encuesta dirigida a las 36 Unidades de Mama Acreditadas por la SESPM, en ese momento. La encuesta se planteó a lo largo del mes de junio de 2019 y constó de 11 preguntas respuesta dicotómica (sí/no) o múltiple en función del tipo de pregunta.

De ellas, hemos seleccionado, para comentar en este trabajo, las que nos han parecido de mayor interés, bien por la cuestión en sí misma o por las respuestas obtenidas.

Contestaron 26 Unidades, es decir, el 72,2% de las encuestadas. Por especialidades, 10 fueron ginecólogos, 5 cirujanos, 9 oncólogos y 2 patólogos.

## **MATERIAL Y MÉTODOS:**

Las preguntas y posibles respuestas se realizaron a través de la plataforma SurveyMonkey para facilitar la respuesta on-line de los encuestados, así como el posterior análisis de los datos obtenidos.

En la tabla 1 constan las preguntas realizadas, las posibles respuestas y los porcentajes desglosados para cada respuesta.

Los resultados fueron presentados y discutidos en el 4<sup>a</sup> Congreso Español de la Mama (4<sup>o</sup> CEMA). Para su publicación, las autoras seleccionaron, a su criterio, las ocho preguntas de mayor interés a la luz de las respuestas, referenciadas en el texto de acuerdo con su numeración en la tabla 1 y cuyos comentarios se basan en la revisión de la literatura.

En ningún caso, nuestros objetivos fueron emitir juicios a partir de las respuestas de los encuestados sino más bien obtener la fotografía real del uso de las plataformas en nuestro entorno, aportando, en los casos en que lo hemos creído conveniente, información relevante que, a nuestro juicio, puede ser de interés.

## **RESULTADOS:**

### **Pregunta 3: ¿Utiliza firma genómica (FG) en su práctica diaria?**

**Un 96,1% de los encuestados respondió afirmativamente.** Por tanto, casi un 4% de los encuestados no usa ninguna plataforma genómica en su práctica diaria. Dado que el uso de plataformas genómicas está en nuestro país financiado para indicaciones concretas y que su uso

está recomendado en todas las guías clínicas, SESPm, NCCN, NICE, ASCO, EGTM, el panel de expertos de St Gallen e incluso en la última edición del TNM, cabe plantearse si las razones para no aplicarlas pueden ser dificultades logísticas en el manejo del tejido, desconfianza en los resultados o por considerar que, para la decisión terapéutica, es suficiente el estudio inmunohistoquímico. El hecho de que la nueva ampliación de las indicaciones (pacientes con ganglios positivos de 1 a 3), no esté financiadas por algunas comunidades autónomas, puede ser otra limitante para su uso.

**Pregunta 4: ¿Cuáles son las indicaciones en su hospital? La pregunta constaba de cuatro respuestas posibles: [<50 años, RE+, HER2 -, N0], [<50 años, RE+, HER2 -, N1], [>50 años, RE+, HER2 -, N0] y [>50 años, RE+, HER2 -, N1].**

**Para la mayoría de los encuestados, la FG se usa fundamentalmente en pacientes [RE+ / Her2 - / N0],** independientemente de la edad de la paciente (fig1). Entre los encuestados, por tanto, la edad no es una variable que impacte en el uso de FG. Aunque no se observa que la edad sea una condición limitante para el uso de la plataforma, debemos recordar que sólo MammaPrint®, OncotypeDx® y EndoPredict® tienen aprobada la indicación tanto para pacientes pre como postmenopáusicas.

Respecto al uso de FG en pacientes N1, solo la cuarta parte de los encuestados (27%) las utiliza en este subgrupo de pacientes, mientras que el 73% sólo las usa en pacientes [RE+/Her2 negativo/N0]. Aunque la evidencia disponible actualmente apoya su uso en ganglios positivos de 1 a 3, la falta de financiación por parte de algunas comunidades para los casos N1 es una limitante importante para su uso en ese contexto clínico.

Actualmente, MammaPrint® es la única FG con evidencia 1A para su uso en pacientes N1-3. La evidencia de OncotypeDx®, Prosigna® y EndoPredict® para estas pacientes es actualmente sólo 2B (Guía NICE 2020) (1,2,3,4).

### **Pregunta 5: ¿Cree en la evidencia como base estratégica para la toma de decisiones médicas?**

**El 100% de los encuestados contestó afirmativamente.** El significado de la evidencia y grados de recomendación, a pesar del valor que dan a esa condición la mayoría de los encuestados, no siempre es claro. Los niveles de evidencia se basan en el diseño del estudio y la calidad metodológica de estudios individuales. Los grados de recomendación se basan en la fortaleza de la evidencia que soporta el estudio. La jerarquía de los distintos tipos de estudios es de más a menos, revisiones sistemáticas y metaanálisis de ensayos controlados y randomizados, estudios observacionales, estudios no experimentales, opinión de experto. Los niveles de evidencia más altos se adquieren en base a metaanálisis de alta calidad y revisiones sistemáticas mientras que los niveles más bajos de evidencia se basan en la opinión de expertos. Hay varios modelos de clasificación de evidencia, pero la que generalmente se emplea es la propuesta por *Centre for Evidence-Based Medicine, Oxford (OCEBM)* (5) que jerarquiza la evidencia en niveles que van del 1 a 5, (siendo el nivel 1 la "mejor evidencia" y el nivel 5 la "peor, la más mala o la menos buena"), junto con grado de recomendación A-D. Tiene la ventaja de que nos asegura el conocimiento más atinente a cada escenario, por su alto grado de especialización. Además, tiene la prerrogativa de aclarar cómo afecta la falta de rigurosidad metodológica al diseño de los estudios, disminuyendo su valoración no sólo en la gradación de la evidencia, sino que también en la fuerza de las recomendaciones. En la tabla 2, recordamos las diferencias en los niveles 1.

Llama la atención que, a pesar de que el 100% de los encuestados responde creer en la evidencia como base para la toma de decisiones médicas, se utilizan pruebas con evidencia 2A a pesar de estar disponibles en el mercado pruebas con evidencia 1A.

**Pregunta 6: ¿Cree que el grupo de riesgo asignado por la firma genómica depende de la plataforma utilizada?**

**El 65,3% (17 respuestas) de los encuestados creen que sí y el 34,6% (9 respuestas) creen que no.** En las décadas recientes, el reconocimiento de distintos subtipos moleculares intrínsecos ha evidenciado la complejidad de la biología del cáncer de mama. A pesar de que la inmunohistoquímica (IHQ) es la técnica comúnmente aplicada para la clasificación molecular subrogada del cáncer de mama, los ensayos basados en la expresión de genes (BluePrint®, PAM50) evalúan un mayor número de genes que los subrogados IHQ/FISH y pueden reclasificar un número significativo de pacientes en función de los *pathways* moleculares. Esta reclasificación puede tener importantes consecuencias para la toma de decisiones terapéuticas, la respuesta tumoral a drogas específicas y para el seguimiento clínico. En consecuencia, surgen dos cuestiones fundamentales:

*1. ¿Existe coincidencia entre el subtipo intrínseco asignado por plataforma genética y el subtipo intrínseco-like, asignado por IHQ? En caso de que no, ¿Añade información la plataforma genética al subtipo IHQ?*

Las discordancias entre la IHQ y los paneles génicos han sido estudiadas en numerosos estudios recientes: Paquet y Hallet encuentran una discordancia del 28,6% entre el subtipo intrínseco por PAM50 y el inmunofenotipo IHQ (6).

Hee Kyung Kim encuentran discordancias en el 38,4% de los casos al comparar PAM50 con el subtipo molecular subrogado por IHQ. Sólo el 29% de los pacientes HER2-enriched (PAM50) fueron HER2+ por IHQ. Los autores comentan que dicha discordancia puede ser causa de infra o sobre-tratamiento ya que pacientes HER2-enriched/HER2 negativos -IHQ (71%) podían perder beneficio potencial a la terapia monoclonal (7). A pesar de que la Conferencia de Gallen 2011 recomienda tratar a las pacientes en base a la evaluación IHQ

de RE, RP, HER2 y Ki-67, los resultados de este estudio sugieren que esas discordancias deberían ser tenidas en cuenta.

En el estudio de Parker et al (8), los autores comparan el subtipo molecular por PAM50 con el subrogado -IHQ y observan que, de 626 tumores RE+ (IHQ), el 73% fueron Luminal (A o B), el 11% fueron Her2-enriched, el 5% fueron Basal-like y el 12% fueron Normal-like. Contrariamente, los tumores RE- (IHQ) comprendieron un 11% de Luminal, 32% de Her2 -enriched, un 50% de Basal-like y un 7% de Normal-like. Es decir, los autores observan discordancias del 45,1% en el grupo Luminal, siendo Luminal A solo el 58,3% de los HR+/HER2 -. De los tumores HR-/HER2+, fueron HER2-enriched el 80% y de los Her2-positivos (IHQ), sólo el 51% fueron Her2-entiched por PAM50.

Viale et al, en un estudio comparativo entre IHQ y Blueprint® (9), observan que Blueprint® reclasifica el 30% de los casos. El grupo con mayor discordancia fue el de los Luminales y el más concordante el de los Triple Negativos (TN). Blueprint® reclasificó el 54% de los Luminal B (IHQ) como Luminal A (Low Risk), el 38% de los HER2+ (IHQ) como Luminal (A o B) y el 5% como Basal. Del grupo Triple Negativo IHQ, el 5% fueron reclasificados por Blueprint® como Luminal (A o B).

Tomados estos datos en conjunto, observamos que las mayores discrepancias se dan en el grupo Luminal (entre bajo y alto riesgo, Luminal A vs Luminal B) y en el grupo Her2-enriched.

Estos resultados sugieren, en conjunto, que pacientes del mismo subtipo subrogado- IHQ tienen importantes diferencias genéticas y que su clasificación inmunofenotípica puede resultar en tratamientos inadecuados y pobre supervivencia, lo que plantea la necesidad de revisar las guías actuales para asegurar la correcta caracterización intrínseca de los tumores.



Para explicar las discordancias, se han planteado distintos argumentos y múltiples estudios atribuyen dichas discordancias a alteraciones en la fijación del tejido, la elección del anticuerpo y variaciones en la interpretación. Hammond et al observan que hasta el 20% de los resultados de Receptores de Estrógeno y de Progesterona pueden ser inadecuados (10) mientras que otros estudios refieren que esa tasa podría incluso ser mayor(11) (12).

Otros estudios, sin embargo, encuentran altas tasas de concordancia entre la IHQ y la expresión génica por microarrays, considerando su uso exclusivamente para la clasificación molecular del carcinoma de mama (13-17).

Otra causa potencial de discordancia entre FG y IHQ es atribuible al factor de proliferación Ki-67. Uno de los criterios para discriminar entre bajo y alto riesgo es el Ki-67, cuya reproducibilidad es alta para los porcentajes <30 y >60, pero pobre para la franja intermedia. Además, los puntos de corte para Ki-67 han cambiado a lo largo del tiempo. En 2011, el Grupo de Expertos de St Gallen en 2011 propuso un punto de corte del 14% (18) pero dos años más tarde, Cheang et al (19) propusieron modificarlo al 20% dada la escasa reproducibilidad del punto de corte inicial.

Respecto a la reproducibilidad IHQ del Her2, aunque tanto la IHQ como el FISH han demostrado buena especificidad y buena sensibilidad en la mayoría de los casos, siguen pendientes de resolver algunas cuestiones como la correcta clasificación de los casos equívocos (aproximadamente el 12%), la identificación de los casos “Her2-low” o la predicción temprana de resistencias a la terapia monoclonal (20).

Otros autores (21) comparan el “subtipo clínico” (IHC /FISH) con MammaPrint®/Blueprint® en una serie de 474 pacientes para predecir la sensibilidad al tratamiento, reclasificando 87 de los 474 (18%) pacientes como Basal *type* con una tasa de Respuesta Patológica Completa del 32% frente al 11% de los tumores Luminal “clínico”.

2. La segunda cuestión, en relación a la predicción de riesgo para casos individuales, plantea si el riesgo de recidiva y metástasis (y, en consecuencia, la elección de tratamiento quimioterápico sí o no) asignado por distintas FG es el mismo o puede variar en función de la que apliquemos. Es decir, ¿clasifican en la misma categoría de riesgo las diferentes plataformas genómicas?

El estudio de Barlett et al (22) observa una discordancia del 60% en el nivel de riesgo entre las distintas plataformas comparadas (MammPrint®, Oncotype DX®, PAM50, IHC4, IHC4-AQUA). Estas diferencias son imputables a la diferencia de genes incluidos en cada plataforma, a las distintas tecnologías implicadas y a los distintos métodos matemáticos aplicados en su desarrollo, pero lo importante es saber si esas diferencias impactan en el pronóstico de los pacientes individuales. En el estudio de Cheng, (23) se observa que, a nivel general, a pesar de la escasa concordancia entre los genes incluidos en las distintas plataformas evaluadas, los distintos modelos ofrecen predicciones similares ya que reflejan fenotipos celulares comunes que abarcan las diferencias existentes entre el cáncer [RE+ luminal] y el [RE- (basal-like, Her2+ y RE negativo)].

A nivel individual, los datos comparativos de las distintas plataformas, limitados y basados en la reconstrucción in silico de las pruebas existentes, sugieren un grado de concordancia solo “moderada”, siendo estadísticamente significativas las discordancias entre predicciones individuales. La pregunta, sin embargo, es hasta cierto punto retórica habida cuenta de que no todas las FG contemplan las mismas categorías de riesgo (MammaPrint®, EndoPredict®: Alto y Bajo Riesgo, OncotypeDx® y PAM50: Alto, Intermedio y Bajo riesgo).

Recientemente, el estudio PROMIS, cuyo objetivo fue reevaluar con MammaPrint® una serie de 840 pacientes clasificados como riesgo intermedio por la plataforma de 21 genes,

reclasificó el 44,5% en bajo riesgo y el 55,5% en alto riesgo. Ello comportó cambios en la decisión terapéutica en 33,6% de los pacientes incluidos en el estudio tras recibir los resultados de la plataforma de 70 genes, evitándose quimioterapia en 28,9% de los pacientes de bajo riesgo MammaPrint® y añadiéndose en un 36,7% de los pacientes clasificados de alto riesgo en la plataforma de 70 genes. En conclusión, el estudio demuestra que, efectivamente, existen diferencias en el grupo de riesgo asignado en función de la plataforma genómica aplicada. El estudio Orucevic (24) sobre el impacto de la categoría de riesgo intermedio, cuyo VPP fue solo del 40,1%, refleja la falta de recomendaciones terapéuticas para ese grupo de pacientes.

¿A qué se deben esas diferencias? A nuestro juicio, una de las razones fundamentales es la escasa o ninguna coincidencia entre los genes que constituyen las distintas plataformas (entre MammaPrint® y OncotypeDx® sólo hay coincidencia en un gen), lo que puede generar variación en el grupo de riesgo asignado. En conclusión, creemos que el uso de la plataforma genómica mejora la decisión terapéutica en casi un tercio de los casos.

**Pregunta 7: ¿Considera determinante en la toma de decisión terapéutica el resultado del test genómico?** Casi la mitad de los encuestados (42,3%, 11 respuestas) dicen que en más de la mitad de los casos (pero no siempre) sí lo es y el 3,8% (1 respuesta) dice que en menos de la mitad de los casos. A nuestro juicio, aunque la mayoría de las plataformas genéticas utilizadas tiene un nivel de evidencia I en pacientes RE+, HER2-, N0, las de resultado dicotómico aportan mayor claridad a la decisión terapéutica.

El estudio Promis refiere el incremento de confianza en MammaPrint® que experimentan los facultativos a partir de la reclasificación de los casos de riesgo intermedio por OncotypeDx® y observan una adherencia a la recomendación del test del 88% para los pacientes RH+ que

requieren QT y de un 91% para los pacientes de bajo riesgo susceptibles de evitar la quimioterapia.

Por otra parte, el estudio prospectivo IMPACt (25), compara en una serie de 358 pacientes la estrategia recomendada por el médico antes y después de recibir los resultados de la prueba MammaPrint®/Blueprint®, observando cambios de la decisión terapéutica en un 24% de los casos. Además, el estudio observa que, en el 72% de los casos incluidos, las pacientes tenían mayor confianza en el plan terapéutico propuesto después de recibir los resultados de la FG.

**Pregunta 8. ¿Cree que ofrece alguna ventaja realizar el test en el propio hospital?**

**Más de la mitad de los encuestados (53,8%, 14 respuestas) consideran que realizar la plataforma en el propio hospital ofrece rapidez en la respuesta y optimización de recursos. El 8% de los encuestados (2 respuestas) cree que mejora la comprensión del resultado y el 27% (7 respuestas) no considera que tenga ninguna ventaja.**

En nuestra opinión, más importante que la procedencia de la información aportada por la FG, sea de procedencia interna o externa, es que ésta sea de calidad y sea incluida en el informe patológico para que conste en la historia clínica de la paciente. Además, el resultado de la FG debe ser evaluado por el patólogo, comparado con el inmunofenotipo inmunohistoquímico del tumor, no siempre coincidente, y contextualizado con los hallazgos morfológicos y los datos clínicos de la paciente. Esta información debe ser discutida en el comité de tumores para tomar las decisiones terapéuticas sobre el mejor conocimiento posible, con las herramientas actuales, de la biología tumoral.

**Pregunta 9: ¿Cree que la FG tiene algún impacto sobre el tratamiento axilar? El 62% de los votantes (16 respuestas) opinó que no frente al 38% (10 respuestas), que opinó que sí.**

Al respecto de las respuestas, sería interesante, en nuestra opinión, saber cómo se ha interpretado la pregunta y nuestros comentarios se estructuran en relación a cinco ejes distintos:

1. Estadificación axilar y subtipos moleculares: Actualmente, pocas veces indicamos el tratamiento axilar en función del tipo molecular, a excepción de las pacientes de edad avanzada con tumores en estadio inicial y receptores positivos en los que se sabe que la linfadenectomía e incluso el ganglio centinela, no aporta ningún beneficio en la supervivencia.

En un estudio prospectivo randomizado que incluyó 473 pacientes de  $\geq 60$  años con tumores de T1-T3, con una media de 74 años, las pacientes fueron asignadas a cirugía con linfadenectomía versus cirugía sin vaciamiento axilar seguido de tamoxifeno y un seguimiento de 5 años. El objetivo primario fue calidad de vida. Con una media de seguimiento de 6.6 años no se encontraron diferencias en supervivencia libre de enfermedad (grupo de vaciamiento 67%, no vaciamiento 66% IC 0.79-1.42,  $p=0.69$ ) ni en supervivencia global (vaciamiento 75% no vaciamiento 73% IC 95% 0.76-1.46  $p=0.77$ ). En cuanto a los cuestionarios de calidad de vida, fueron mejores para el grupo sin vaciamiento axilar (26).

Resultados similares se observan en otro estudio randomizado que incluyó 219 pacientes T1 N0 con ganglios negativos de 65 a 80 años, con receptores hormonales positivos (88%) y tratamiento con tamoxifeno. No se encontraron diferencias estadísticamente significativas en mortalidad, eventos en la mama o axila, ni supervivencia global. Estos resultados hacen concluir a los autores que la disección axilar puede omitirse en pacientes con cáncer de mama en estadio inicial sin ganglios palpables. Incluso concluyen que también el ganglio centinela no aportaría ningún beneficio en pacientes de edad avanzada con receptores positivos (27).

Así pues, dejando aparte este grupo especial de pacientes añosas con receptores hormonales positivos en los que sí podríamos considerar que los subtipos moleculares

pueden influenciar en la cirugía axilar, en el resto de los casos, de momento, no tenemos evidencias para decidir la cirugía axilar en función del subtipo molecular.

2. Afectación axilar y subtipos moleculares: Otro aspecto es considerar si el tipo molecular afecta la tasa de afectación ganglionar. Existen evidencias de que la clasificación subrogada en los 5 subtipos sí que están relacionados con la tasa de afectación axilar. En un estudio de 2984 tumores clasificados en subtipos moleculares, después de ajustar por factores confusores, pudo evidenciarse que el subtipo intrínseco era predictor de afectación ganglionar en tumores luminal B Her 2 (OR=1.49 p= 0.09), Her 2 sobre-expresado (OR 1.61 p= 0.015) y Basal-like (OR 0.60 p= 0.02) (28). También es conocido, que a pesar del mal pronóstico y la mayor probabilidad de recidiva local de los tumores triple negativos, presentan menor probabilidad de invasión linfovascular y afectación ganglionar, hecho que sugiere que este tipo de tumores metastatizan menos frecuentemente por vía linfática. Este hecho se observó en una serie de 11596 tumores que fueron clasificados en tipos subrogados, ajustando las otras variables se evidenció que los tumores Luminal y Her 2 tenían más invasión vascular mayor probabilidad de tener > 4 ganglios, que los tumores triple negativos (29).

Así pues, reconociendo que la afectación ganglionar y la clasificación molecular son dos factores pronóstico importantes, es pertinente estudiar la relación directa entre los dos aspectos y el valor pronóstico de la afectación ganglionar en los diferentes subtipos moleculares.

En un estudio con 4262 pacientes, se evidenció que los tumores luminal A-like y los tumores triple negativos tienen menos probabilidad de afectación ganglionar y de presentar un estadio ganglionar pN3 que los tumores luminal B y Her 2 (30). A pesar que algunos otros estudios parecen no demostrar relación entre subtipos moleculares y

afectación ganglionar (31), parece ser que el estado ganglionar y los subtipos moleculares juegan un papel importante como factores pronóstico en pacientes con cáncer de mama.

3. Elección del tratamiento primario: Para la elección del tratamiento primario, una vez finalizado el diagnóstico y el estudio de extensión, se consideran dos aspectos: el T- N y el subtipo molecular. En líneas generales a partir de cierto tamaño (2 cm o incluso menos) y con afectación ganglionar, se valora la indicación de un tratamiento primario ya sea con quimioterapia u hormonoterapia con el objetivo de testar la quimio u hormono-sensibilidad del tumor, reducir la estadificación para realizar una cirugía menos agresiva e intentar una respuesta patológica completa que pueda convertirse en un factor pronóstico independiente. De esta manera, el subtipo molecular se convierte en un factor predictivo de tratamiento.

Así pues, si nos basamos en el subtipo molecular como un factor para la elección de un tratamiento neoadyuvante, es importante considerar que existen discrepancias entre los subtipos moleculares subrogados y los perfiles por plataformas génicas.

*Tipos subrogados y perfiles de expresión génica*: En un estudio de 426 pacientes con el objetivo de comparar el subtipo molecular por Inmunohistoquímica y hibridación in situ con fluorescencia, versus plataforma génica Mammaprint®/BluePrint® como predictor de quimio-sensibilidad, se observó una reasignación diferente en el 22% de los casos. Un 42% de tumores Her 2 por Inmunohistoquímica fueron reclasificados en otros grupos, 98% de triple negativos se confirmaron como basales por BluePrint® y 96% de los tumores luminales se confirmaron por BluePrint®. Los dos grupos que al reclasificarse mejoraron en el estudio respecto a las tasas de respuesta completa fueron los Her 2 y los tumores luminales que se reclasificaron como tumores basales (32). Así

pues, deberíamos preguntarnos si antes estas discrepancias sería necesario ampliar las indicaciones de las plataformas de genes para elegir de manera más dirigida el tratamiento primario.

4. Plataforma génica como factor predictivo de respuesta a tratamiento neoadyuvante.

Hasta el momento actual, en el escenario asistencial, hacemos un uso restrictivo de las plataformas génicas. Así su utilización queda la mayoría de las veces restringida a aquellos casos en los que es dudoso el beneficio de la quimioterapia adyuvante, ya sea por tamaño del tumor, afectación ganglionar, factores pronósticos en el límite o discordantes. La asignación de alto riesgo de recidiva por la plataforma nos ayuda a decidir el tratamiento de quimioterapia a pesar de los posibles efectos secundarios asociados. Un uso ampliado sería usar las plataformas génicas como factor predictivo de respuesta a tratamiento neoadyuvantes.

- Quimioterapia neoadyuvante: Los tumores con receptores hormonales positivos tienen una biología muy heterogénea y representan un reto para una precisa elección de tratamiento. En el estudio *Neoadjuvant Breast Registry Symphony Trial*, 474 tumores fueron clasificados con Mammaprint®/Blueprint® comparando con la clasificación previa por Inmunohistoquímica y las tasas de respuesta completa a quimio/hormonoterapia primaria. La clasificación por Mammaprint® tuvo mayor probabilidad de respuesta completa que la realizada por inmunohistoquímica, y un 18% (87/474) de tumores luminales fueron reclasificados en diferentes subgrupos (1 Her 2, 86 basales). Los pacientes con tumores basales por BluePrint® presentaron unas tasas de respuesta completa



del 32 % a la quimioterapia, mientras los tumores luminales BluePrint® tuvieron una repuesta clínica parcial del 68% a la hormonoterapia (33)(32).

- Hormonoterapia neoadyuvante: El uso predictivo de las plataformas génicas se ha aplicado también en el escenario de la hormonoterapia primaria. Así se estudió las biopsias de 87 pacientes con tumores hormonales positivos que habían recibido tratamiento hormonal como tamoxifeno o anastrozol. Se les aplicó el perfil de expresión de 21 genes (OncotypeDx®) para estudiar si el *recurrence score* (RS) predecía la respuesta a la hormonoterapia primaria. A pesar de la falta de material en la biopsia, en la mitad de los casos se evidenció que si RS era bajo existía una mayor tasa de respuesta a la hormonoterapia primaria que si era intermedio o alto (34). En este mismo sentido, en el estudio TranNeos se evaluó si el RS de OncotypeDx® es capaz de predecir la respuesta a la hormonoterapia primaria. El objetivo primario fue objetivar la respuesta clínica (completa o parcial) a Letrozol neoadyuvante para  $RS < 18$  (55%) versus 22% para  $RS \geq 31$ . Además se observó que los pacientes con un  $RS > 18$  tenían más probabilidad después del tratamiento neoadyuvante en que se les realizara una cirugía conservadora versus los pacientes con  $RS \geq 31$  (35).

5. Cirugía axilar y plataforma génica: La evolución de la cirugía axilar, el desarrollo y consolidación de la técnica de ganglio centinela, y cambios de paradigmas como el realizado a partir del estudio ACOSG Z0011 (36) han hecho que el concepto actual de cirugía axilar haya cambiado totalmente. La cirugía axilar es un método de estadificación, conservando el *debulking* tumoral en axilas con alta carga tumoral axilar y en la enfermedad quimio o hormono-resistente. De esta manera, si las plataformas génicas son predictivas de respuesta a la quimioterapia u hormonoterapia, en casos de

afectación axilar, hemos de conseguir una respuesta completa axilar para disminuir la agresividad de la cirugía y evitar vaciamientos axilares.

**Pregunta 10. ¿Cree que la firma evalúa o puede evaluar el riesgo de una recaída tardía a 5 años? ¿Y a 10 años? ¿A más de 10 años?**

**El 19,2% de los encuestados (5 respuestas) creen que sí a 5 años mientras que el 76,9% (20 respuestas) contestaron que la FG puede evaluar el riesgo de una recidiva a 10 años. Un 3,8% (1 respuesta) contestó que la FG puede evaluar el riesgo de recaída a más de 10 años.**

Conocer la biología del cáncer de mama es la clave para ajustar los tratamientos al riesgo de recidiva y evitar el sobretratamiento. Desde hace unas décadas nos basamos en parámetros clínicos e histológicos que nos han permitido definir los tipos subrogados para indicar las diferentes terapias. Las plataformas de expresión génica representan un paso más para personalizar los tratamientos y definir las pacientes de alto riesgo que necesitarán los tratamientos precisos a pesar de su agresividad, en contraposición a aquellas con tumores indolentes de crecimiento lento y de muy baja probabilidad de recidiva, a las que deberemos aplicar terapias con menos efectos secundarios o incluso simplemente control cercano y armado. Y este aspecto, es todavía de más importancia, porque el cribado poblacional ha incrementado el diagnóstico de los tumores de bajo riesgo, indolentes, a los que hoy en día aplicamos los mismos tratamientos que a otros de alto riesgo (37).

La heterogeneidad biológica del cáncer de mama es tan variada, que el tiempo de latencia a la recidiva pueda oscilar entre pocos meses a varias décadas después del diagnóstico y tratamiento. Las plataformas génicas identifican tumores de riesgo precoz de recidiva y pacientes que se benefician del tratamiento de quimioterapia para disminuir este riesgo (38). En un análisis

secundario del estudio STO-3 que incluye 652 pacientes menopáusicas con dos grupos según si habían recibido tratamiento con tamoxifeno (339) o no (313). Estas pacientes fueron catalogadas por Mammaprint de bajo riesgo el 58%, y el 42 % de alto riesgo. Con la plataforma Mammaprint se encontraron 98 pacientes de *ultralow risk* (15%). Con un seguimiento de 20 años, las pacientes catalogadas de bajo y alto riesgo, pero no *ultralow risk* tenían un porcentaje superior y estadísticamente significativo de mortalidad específica por cáncer. La supervivencia específica a 15 años de las pacientes *ultralow risk* en el grupo tratado con tamoxifeno fue de 97 % y 94 % del grupo no tratado. No hubo ninguna muerte en el grupo *ultralow risk* con tratamiento con tamoxifeno. En cuanto a las características de los tumores *ultralow risk*, todos eran Receptores hormonales positivos-Her 2 negativo, y Luminales por BluePrint. El 96% tenían un Ki 67 < 15% y el 89 % eran tumores luminales por PAM 50. En cambio, sólo el 19% de los tumores con receptores hormonales positivos-Her 2 negativos y el 20 % de los tumores con Ki 67 bajo eran *ultralow risk*. Además, el 25 % de los luminales por PAM 50 y el 26% por BluePrint fueron *ultralow risk*. (39). Las pacientes de este grupo tienen tan buen pronóstico que, si fuéramos capaces de identificar los precursores de estos tumores, cuando se diagnosticaran por cribado podría plantearse abstención terapéutica y control. De esta manera, podemos concluir que la Inmunohistoquímica es incapaz de seleccionar estos tumores de crecimiento indolente y de bajo riesgo, y que solamente la plataforma génica los identifica, con las ventajas terapéuticas que pueden derivarse, al evitar un sobretratamiento y su morbilidad asociada.

## **PERSPECTIVAS:**

Los perfiles de expresión génica permiten la identificación de los subtipos moleculares en cáncer de mama. Pero definir la biología del cáncer en base a la expresión génica

exclusivamente y sin conocimiento de los cambios relacionados en el proteoma sigue siendo un reto ya que las proteínas son la clave funcional de la biología, así como dianas terapéuticas de las drogas anti-cáncer.

Avances tecnológicos recientes en espectrometría de masas han revelado ideas que no habían sido reveladas por los estudios basados en el ARNm, de tal manera que los análisis “proteo-transcriptómicos” tienen el potencial de descubrir alteraciones moleculares de la biología del cáncer, no descritas previamente.

Un estudio reciente (40) revela que el proteoma y el transcriptoma describen parcelas diferentes de la biología de los tumores y que las proteínas están más frecuentemente sobre-reguladas que sus correspondientes transcritos. Así, abundancia de ARNm predice de manera incompleta la abundancia proteica en tejido procedente de cáncer de mama, incluso con menor correlación que en el tejido no tumoral circundante. Además, los patrones de enfermedad descritos por el proteoma fueron capturados solo parcialmente por el transcriptoma tumoral, coincidiendo con los resultados procedentes del grupo CPTAC del NIH.

El estudio descubre que concordancia entre ARNm- proteoma en cáncer de mama es un nuevo factor pronóstico, característico, que se asocia a subtipo molecular, agresividad y menor supervivencia. Pocos estudios investigan si la firma proteómica del cáncer permite clasificar en subgrupos pronósticos.

Esta y otras líneas de investigación siguen siendo necesarias para avanzar en el entendimiento, diagnóstico y tratamiento de una enfermedad compleja como es el carcinoma de mama.

## CONCLUSIONES

La realización de las plataformas génicas impacta en la toma de decisión modificando la recomendación terapéutica y reduciendo en general el número de pacientes tratadas con

quimioterapia adyuvante. Nuestra encuesta fue exploratoria y, por tanto, su valor es solo orientativo. Aunque no permite obtener conclusiones definitivas dado el pequeño tamaño de la muestra, nos sirvió como punto de partida para clarificar algunas conclusiones basadas en la evidencia científica, útiles, a nuestro juicio, para afianzar conceptos básicos.

- Las indicaciones para FG, financiadas por la Administración Pública, deben ser replanteadas y ampliadas, a la luz de las nuevas evidencias, en ganglios positivos y, en un futuro muy cercano, en el escenario de la neoadyuvancia.
- Aunque todos los encuestados dicen saber y creer en la evidencia para la toma de decisiones, frecuentemente desconocemos los datos de esa evidencia y no somos coherentes con ella.
- MammaPrint® es la única plataforma con nivel de evidencia 1ª para su uso en pacientes N1.
- La inmunohistoquímica y la firma genómica no dan información intercambiable sino complementaria.
- El uso de las firmas genómicas aumenta la confianza tanto del médico como de la paciente en la decisión terapéutica.
- Actualmente, no existe evidencia suficiente para que el subtipo molecular sea decisivo en la toma de decisiones sobre la axila.
- MammaPrint® identifica un subgrupo de pacientes con cáncer de mama de “ultra-low risk”, no identificable por otros métodos diagnósticos como la inmunohistoquímica o el FISH, que podrían ser susceptibles de no recibir ningún tratamiento.

Aunque las plataformas genómicas son ya una herramienta de uso habitual en la clasificación y tratamiento del cáncer de mama, la evolución del conocimiento permitirá ofrecer tratamientos innovadores basados en la mejor comprensión de la biología de los tumores.

## CONFLICTO DE INTERESES

Laia Bernet declara tener conflicto de interés por ser co-editora de la revista.

## BIBLIOGRAFÍA

1. Senkus E, Kyriakides S, Ohno S, Penault-Llorca F, Poortmans P, Rutgers E, et al. Primary breast cancer: ESMO Clinical Practice Guidelines for diagnosis, treatment and follow-up † incidence and epidemiology. ESMO Updat Clin Pract Guidel. 2015;26:v8–30.
2. Harris LN, Ismaila N, McShane LM, Andre F, Collyar DE, Gonzalez-Angulo AM, et al. Use of biomarkers to guide decisions on adjuvant systemic therapy for women with early-stage invasive breast cancer: American Society of clinical Oncology clinical practice guideline. J Clin Oncol. 2016 Apr 1;34(10):1134–50.
3. Krop I, Ismaila N, Andre F, Bast RC, Barlow W, Collyar DE, et al. Use of biomarkers to guide decisions on adjuvant systemic therapy for women with early-stage invasive breast cancer: American society of clinical oncology clinical practice guideline focused update. J Clin Oncol. 2017 Aug 20;35(24):2838–47.
4. NCCN Clinical Practice Guidelines in Oncology [Internet]. [cited 2020 May 29]. Available from: [https://www.nccn.org/professionals/physician\\_gls/default.aspx](https://www.nccn.org/professionals/physician_gls/default.aspx)
5. You searched for Oxford Centre for Evidence-based Medicine (CEBM). Centre for Evidence Based Medicine - Levels of Evidence (March 2009). - CEBM [Internet]. [cited

2020 May 29]. Available from:

<https://www.cebm.net/?s=Oxford+Centre+for+Evidence-based+Medicine+%28CEBM%29.+Centre+for+Evidence+Based+Medicine+-+Levels+of+Evidence+%28March+2009%29.+>

6. Paquet ER, Hallett MT. Absolute Assignment of Breast Cancer Intrinsic Molecular Subtype. *J Natl Cancer Inst* [Internet]. 2015 [cited 2020 May 29];107(1):357. Available from: [www.ncbi.nlm.nih.gov/geo](http://www.ncbi.nlm.nih.gov/geo),
7. Kim HK, Park KH, Kim Y, Park SE, Lee HS, Lim SW, et al. Discordance of the PAM50 Intrinsic Subtypes Compared with Immunohistochemistry-Based Surrogate in Breast Cancer Patients: Potential Implication of Genomic Alterations of Discordance. *Cancer Res Treat*. 2019;51(2).
8. Parker JS, Mullins M, Cheang MCU, Leung S, Voduc D, Vickery T, et al. Supervised Risk Predictor of Breast Cancer Based on Intrinsic Subtypes. *J Clin Oncol* [Internet]. 2009 [cited 2020 May 29];27:1160–7. Available from: [www.jco.org](http://www.jco.org).
9. Viale G, de Snoo FA, Slaets L, Bogaerts J, van 't Veer L, Rutgers EJ, et al. Immunohistochemical versus molecular (BluePrint and MammaPrint) subtyping of breast carcinoma. Outcome results from the EORTC 10041/BIG 3-04 MINDACT trial. *Breast Cancer Res Treat*. 2018 Jan 1;167(1):123–31.
10. Elizabeth H Hammond BM, Hayes DF, Wolff AC, Mangu PB, Temin S. Pathologists Guideline Recommendations for Immunohistochemical Testing of Estrogen and Progesterone Receptors in Breast Cancer. 2010 [cited 2020 May 29]; Available from: <http://jop.ascopubs.org>
11. Viale G, Regan MM, Maiorano E, Mastropasqua MG, Dell'Orto P, Rasmussen BB, et al. Prognostic and predictive value of centrally reviewed expression of estrogen and

progesterone receptors in a randomized trial comparing letrozole and tamoxifen adjuvant therapy for postmenopausal early breast cancer: BIG 1-98. *J Clin Oncol*. 2007 Sep 1;25(25):3846–52.

12. Hede K. Breast Cancer Testing Scandal Shines Spotlight on Black Box of Clinical Laboratory Testing. *News | JNCI [Internet]*. 2008 [cited 2020 May 29];100:836. Available from: <https://academic.oup.com/jnci/article-abstract/100/12/836/886464>
13. Sørli T, Perou CM, Tibshirani R, Aas T, Geisler S, Johnsen H, et al. Gene expression patterns of breast carcinomas distinguish tumor subclasses with clinical implications. *Proc Natl Acad Sci [Internet]*. 2001 Sep 11 [cited 2020 May 15];98(19):10869–74. Available from: <https://www.pnas.org/content/98/19/10869>
14. Mouttet D, Laé M, Caly M, Gentien D, Carpentier S, Peyro-Saint-Paul H, et al. Estrogen-Receptor, Progesterone-Receptor and HER2 Status Determination in Invasive Breast Cancer. Concordance between Immuno-Histochemistry and MapQuant™ Microarray Based Assay. 2016;
15. Roepman P, Horlings HM, Krijgsman O, Kok M, Bueno-de-Mesquita JM, Bender R, et al. Microarray-based determination of estrogen receptor, progesterone receptor, and HER2 receptor status in breast cancer. *Clin Cancer Res*. 2009 Nov 15;15(22):7003–11.
16. Wesseling J, Tinterri C, Sapino A, Zanconati F, Lutke-Holzik M, Nguyen B, et al. An international study comparing conventional versus mRNA level testing (TargetPrint) for ER, PR, and HER2 status of breast cancer. *Virchows Arch*. 2016 Sep 1;469(3):297–304.
17. Awadelkarim KD, Arizzi C, Elamin EOM, Osman I, Mekki SO, Biunno I, et al. Tissue microarray (TMA) versus whole section immunohistochemistry in the assessment of ER/PR and Her-2/neu status in a breast cancer series from sudan. Vol. 19, *Breast Journal*. *Breast J*; 2013. p. 446–7.



18. Goldhirsch A, Wood WC, Coates AS, Gelber RD, Thürlimann B, Senn H, et al. Strategies for subtypes-dealing with the diversity of breast cancer: highlights of the St Gallen International Expert Consensus on the Primary Therapy of Early Breast Cancer 2011. *Ann Oncol.* 2011;22:1736–47.
19. Cheang MCU, Chia SK, Voduc D, Gao D, Leung S, Snider J, et al. Ki67 Index, HER2 Status, and Prognosis of Patients With Luminal B Breast Cancer. *Artic | JNCI.* 2009;101:736.
20. Garrison LP, Babigumira JB, Masaquel A, Wang BCM, Lalla D, Brammer M. The Lifetime Economic Burden of Inaccurate HER2 Testing: Estimating the Costs of False-Positive and False-Negative HER2 Test Results in US Patients with Early-Stage Breast Cancer. *Value Heal.* 2015 Jun 1;18(4):541–6.
21. Whitworth P, Beitsch P, Mislowsky A, Pellicane J V, Nash C, Murray M, et al. Chemosensitivity and Endocrine Sensitivity in Clinical Luminal Breast Cancer Patients in the Prospective Neoadjuvant Breast Registry Symphony Trial (NBRST) Predicted by Molecular Subtyping. *Ann Surg Oncol* [Internet]. 2017 Mar 1 [cited 2020 May 29];24(3):669–75. Available from: <http://www.ncbi.nlm.nih.gov/pubmed/27770345>
22. Bartlett JMS, Bayani J, Marshall A, Dunn JA, Campbell A, Cunningham C, et al. Comparing Breast Cancer Multiparameter Tests in the OPTIMA Prelim Trial: No Test Is More Equal Than the Others. 2016 [cited 2020 May 29]; Available from: <https://academic.oup.com/jnci/article-abstract/108/9/djw050/2499553>
23. Fan C, Oh DS, Wessels L, Weigelt B, Nuyten DSA, Nobel AB, et al. Concordance among Gene-Expression–Based Predictors for Breast Cancer. *N Engl J Med* [Internet]. 2006 Aug 10 [cited 2020 May 29];355(6):560–9. Available from: <http://www.nejm.org/doi/abs/10.1056/NEJMoa052933>

24. Orucevic A, Robert •, Heidel E, Bell JL. Utilization and impact of 21-gene recurrence score assay for breast cancer in clinical practice across the United States: lessons learned from the 2010 to 2012 National Cancer Data Base analysis.
25. Soliman H, Shah V, Srkalovic G, Mahtani R, Levine E, Mavromatis B, et al. MammaPrint guides treatment decisions in breast Cancer: results of the IMPACT trial. [cited 2020 May 29]; Available from: <https://doi.org/10.1186/s12885-020-6534-z>
26. Rudenstam CM, Zahrieh D, Forbes JF, Crivellari D, Holmberg SB, Rey P, et al. Randomized trial comparing axillary clearance versus no axillary clearance in older patients with breast cancer: First results of International Breast Cancer Study Group trial 10-93. *J Clin Oncol*. 2006;24(3):337–44.
27. Martelli G, Boracchi P, De Palo M, Pilotti S, Oriana S, Zucali R, et al. A randomized trial comparing axillary dissection to no axillary dissection in older patients with T1N0 breast cancer: Results after 5 years of follow-up. *Ann Surg*. 2005;242(1):1–6.
28. Vasconcelos I, Hussainzada A, Berger S, Fietze E, Linke J, Siedentopf F, et al. The St. Gallen surrogate classification for breast cancer subtypes successfully predicts tumor presenting features, nodal involvement, recurrence patterns and disease free survival. *Breast*. 2016 Oct 1;29:181–5.
29. Ugras S, Stempel M, Patil S, Morrow M. Estrogen Receptor, Progesterone Receptor, and HER2 Status Predict Lymphovascular Invasion and Lymph Node Involvement.
30. Yang ZJ, Yu Y, Hou XW, Chi JR, Ge J, Wang X, et al. The prognostic value of node status in different breast cancer subtypes. *Oncotarget*. 2017;8(3):4563–71.
31. Jones T, Neboori H, Wu H, Yang Q, Haffty BG, Evans S, et al. Are Breast Cancer Subtypes Prognostic for Nodal Involvement and Associated With Clinical-Pathologic Features at Presentation in Early-Stage Breast Cancer? HHS Public Access Author

- manuscript. *Ann Surg Oncol*. 2013;20(9):2866–72.
32. Whitworth P, Stork-Sloots L, De Snoo FA, Richards P, Rotkis M, Beatty J, et al. Chemosensitivity Predicted by Blueprint 80-Gene Functional Subtype and MammaPrint in the Prospective Neoadjuvant Breast Registry Symphony Trial (NBRST). *Oncol*. 2014;21:3261–7.
  33. Whitworth P, Beitsch P, Mislowsky A, Pellicane J V, Nash C, Murray M, et al. Chemosensitivity and Endocrine Sensitivity in Clinical Luminal Breast Cancer Patients in the Prospective Neoadjuvant Breast Registry Symphony Trial (NBRST) Predicted by Molecular Subtyping.
  34. Akashi-Tanaka S, Shimizu C, Ando M, Shibata T, Katsumata N, Kouno T, et al. 21-Gene expression profile assay on core needle biopsies predicts responses to neoadjuvant endocrine therapy in breast cancer patients. *The Breast*. 18:171–4.
  35. Iwata H, Masuda N, Yamamoto Y, Fujisawa T, Toyama T, Kashiwaba M, et al. Validation of the 21-gene test as a predictor of clinical response to neoadjuvant hormonal therapy for ER+, HER2-negative breast cancer: the TransNEOS study. 2019 [cited 2020 May 16];173:123–33. Available from: <https://doi.org/10.1007/s10549-018-4964-y>
  36. Giuliano AE, Ballman K V., McCall L, Beitsch PD, Brennan MB, Kelemen PR, et al. Effect of axillary dissection vs no axillary dissection on 10-year overall survival among women with invasive breast cancer and sentinel node metastasis: The ACOSOG Z0011 (Alliance) randomized clinical trial. *JAMA - J Am Med Assoc*. 2017 Sep 12;318(10):918–26.
  37. Hosseini A, Khoury AL, Esserman LJ. Precision surgery and avoiding over-treatment. *Eur J Surg Oncol* [Internet]. 2017;43(5):938–43. Available from: <http://dx.doi.org/10.1016/j.ejso.2017.02.003>

38. Cardoso F, Van't Veer LJ, Bogaerts J, Slaets L, Viale G, Delaloge S, et al. 70-Gene signature as an aid to treatment decisions in early-stage breast cancer. *N Engl J Med*. 2016 Aug 25;375(8):717–29.
39. Esserman LJ, Yau C, Thompson CK, Van 't Veer LJ, Borowsky AD, Hoadley KA, et al. Use of molecular tools to identify patients with indolent breast cancers with ultralow risk over 2 decades. *JAMA Oncol*. 2017;3(11):1503–10.
40. Tang W, Zhou M, Dorsey TH, Prieto DA, Wang XW, Ruppin E, et al. Integrated proteotranscriptomics of breast cancer reveals globally increased protein-mRNA concordance associated with subtypes and survival. [cited 2020 May 29]; Available from: <https://doi.org/10.1186/s13073-018-0602-x>

**Figura 1.** Porcentaje de utilización de la plataforma por grupos de pacientes

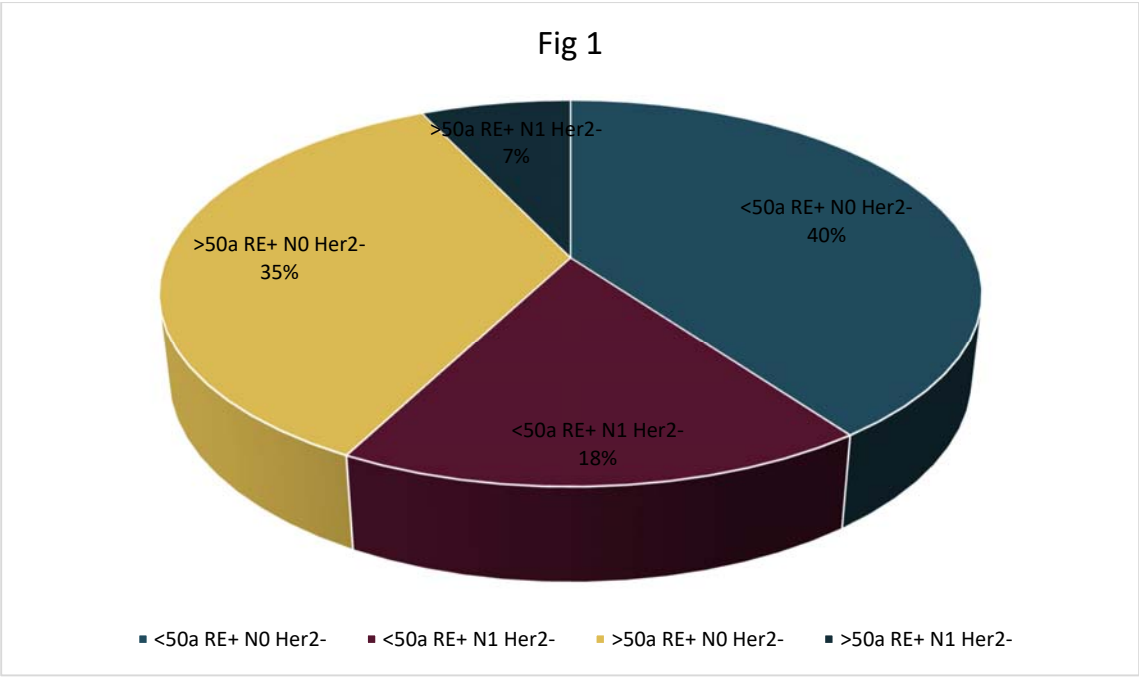

**Tabla 1.** Encuesta. Preguntas, respuestas, porcentajes de cada respuesta y número de respuestas.



| PREGUNTA                                                                               | RESPUESTAS                | %    | Nº DE CASOS |
|----------------------------------------------------------------------------------------|---------------------------|------|-------------|
| 1.CENTRO DE TRABAJO                                                                    |                           |      |             |
| 2. ESPECIALIDAD                                                                        |                           |      |             |
| 3.¿UTILIZA FG EN SU PRÁCTICA DIARIA?                                                   | SI                        | 96,1 | 25          |
|                                                                                        | NO                        | 3,9  | 1           |
| 4.¿CUÁLES SON LAS INDICACIONES EN SU HOSPITAL?                                         | <50ª/RE+/HER2-/N0         | 34,6 | 9           |
|                                                                                        | <50ª/RE+/HER2-/N1         | 19,2 | 5           |
|                                                                                        | >50ª/RE+/HER2-/N0         | 38,4 | 10          |
|                                                                                        | >50ª/RE+/HER2-/N1         | 7,6% | 2           |
| 5. ¿CREE EN LA EVIDENCIA COMO BASE ESTRATÉGICA PARA LA TOMA DE DECISIONES MÉDICAS?     | SI: 100% (26)             |      |             |
|                                                                                        | NO                        | 0    | 0           |
| 6. ¿CREE QUE EL GRUPO DE RIESGO ASIGNADO POR LA FG DEPENDE DE LA PLATAFORMA UTILIZADA? | SÍ                        | 65,3 | 17          |
|                                                                                        | NO                        | 34,6 | 9           |
| 7.¿CONSIDERA DETERMINANTE EN LA TOMA DECISIONES TERAPÉUTICAS EL RESULTADO DE LA FG?    | SIEMPRE                   | 53,8 | 14          |
|                                                                                        | NUNCA                     | 0    | 0           |
|                                                                                        | EN >DEL 50% DE LOS CAOS   | 42,3 | 11          |
|                                                                                        | EN < DEL 50% DE LOS CASOS | 3,8  | 1           |



**Tabla 2.** Niveles de evidencia y recomendación. Centre for Evidence-Based Medicine, Oxford (OCEBM)

| Grado de recomendación | Nivel de evidencia | Tratamiento, prevención, etiología y daño                      | Pronóstico e historia natural                                                                                                                                    | Diagnóstico                                                                                                                                                                                                                                                      | Diagnóstico diferencial y estudio de prevalencia         | Estudios económicos y análisis de decisión                                                                                    |
|------------------------|--------------------|----------------------------------------------------------------|------------------------------------------------------------------------------------------------------------------------------------------------------------------|------------------------------------------------------------------------------------------------------------------------------------------------------------------------------------------------------------------------------------------------------------------|----------------------------------------------------------|-------------------------------------------------------------------------------------------------------------------------------|
| A                      | 1a                 | RS con homogeneidad de EC controlados con asignación aleatoria | RS de estudios de cohortes, con homogeneidad, o sea que incluya estudios con resultados comparables, en la misma dirección y validados en diferentes poblaciones | RS de estudios diagnósticos de nivel 1 (alta calidad), con homogeneidad, o sea que incluya estudios con resultados comparables y en la misma dirección y en diferentes centros clínicos                                                                          | RS con homogeneidad de estudios de cohortes prospectivas | RS con homogeneidad de estudios económicos de nivel 1                                                                         |
|                        | 1b                 | EC individual con intervalo de confianza estrecho              | Estudios de cohortes individuales con un seguimiento mayor de 80% de la cohorte y validados en una sola población                                                | Estudios de cohortes que validen la calidad de una prueba específica, con estándar de referencia adecuado (independientes de la prueba) o a partir de algoritmos de estimación del pronóstico o de categorización del diagnóstico o probado en un centro clínico | Estudio de cohortes prospectiva con buen seguimiento     | Análisis basado en costes o alternativas clínicamente sensibles; RS de la evidencia; e incluyendo análisis de la sensibilidad |
|                        | 1c                 | Eficiencia demostrada por la práctica clínica.                 | Resultados a partir de la efectividad y no de su eficacia                                                                                                        | Pruebas diagnósticas con especificidad tan                                                                                                                                                                                                                       | Series de casos todos o ninguno                          | Análisis absoluto en términos del mayor valor o peor valor                                                                    |

|   |    |                                                                                            |                                                                                                      |                                                                                                                                                                                   |                                                                   |                                                                                                                                                 |
|---|----|--------------------------------------------------------------------------------------------|------------------------------------------------------------------------------------------------------|-----------------------------------------------------------------------------------------------------------------------------------------------------------------------------------|-------------------------------------------------------------------|-------------------------------------------------------------------------------------------------------------------------------------------------|
|   |    | Considera cuando algunos pacientes mueren antes de ser evaluados                           | demostrada a través de un estudio de cohortes. Series de casos todos o ninguno                       | alta que un resultado positivo confirma el diagnóstico y con sensibilidad tan alta que un resultado negativo descarta el diagnóstico                                              |                                                                   |                                                                                                                                                 |
| B | 2a | RS de estudios de cohortes, con homogeneidad                                               | RS de estudios de cohorte retrospectiva o de grupos controles no tratados en un EC, con homogeneidad | RS de estudios diagnósticos de nivel 2 (mediana calidad) con homogeneidad                                                                                                         | RS (con homogeneidad) de estudios 2b y mejores                    | RS (con homogeneidad) de estudios económicos con nivel mayor a 2                                                                                |
|   | 2b | Estudio de cohortes individual con seguimiento inferior a 80% (incluye EC de baja calidad) | Estudio de cohorte retrospectiva o seguimiento de controles no tratados en un EC, o GPC no validadas | Estudios exploratorios que, a través de una regresión logística determinan factores significativos, y validados con estándar de referencia adecuado (independientes de la prueba) | Estudios de cohortes retrospectivas o de seguimiento insuficiente | Análisis basados en costes o alternativas clínicamente sensibles; limitado a revisión de la evidencia; e incluyendo un análisis de sensibilidad |
